# Supplementary material
Source: publisher site journal article supplement (https://www.dovepress.com/article/359789)
Supplement: Supplementary file 1 [file get_supplementary_file.php]

**Supplementary Tables:**

| Table S1. Gen2 Confusion (Degree of Agreement) Matrices | | | | |
| --- | --- | --- | --- | --- |
|  | **Gen2 wake** | **Gen2 Light** | **Gen2 Deep** | **Gen2 REM** |
| wake-N1 | **0.70(0.21)** | 0.18(0.16) | 0.05(0.05) | 0.06(0.09) |
| wake-N2 | **0.71(0.17)** | 0.17(0.14) | 0.05(0.05) | 0.07(0.09) |
| wake-N3 | **0.75(0.18)** | 0.16(0.14) | 0.05(0.05) | 0.04(0.07) |
| Light-N1 | 0.09(0.05) | **0.61(0.12)** | 0.22(0.11) | 0.09(0.07) |
| Light-N2 | 0.1(0.06) | **0.60(0.12)** | 0.20(0.14) | 0.10(0.08) |
| Light-N3 | 0.1(0.06) | **0.60(0.13)** | 0.22(0.12) | 0.09(0.07) |
| Deep-N1 | 0.01(0.05) | 0.23(0.22) | **0.72(0.25)** | 0.03(0.08) |
| Deep-N2 | 0.01(0.02) | 0.20(0.22) | **0.78(0.24)** | 0.01(0.03) |
| Deep-N3 | 0.01(0.04) | 0.19(0.24) | **0.77(0.25)** | 0.02(0.06) |
| REM-N1 | 0.08(0.12) | 0.28(0.18) | 0.07(0.11) | **0.56(0.24)** |
| REM-N2 | 0.08(0.07) | 0.30(0.17) | 0.10(0.12) | **0.53(0.21)** |
| REM-N3 | 0.08(0.1) | 0.32(0.17) | 0.09(0.11) | **0.51(0.24)** |

Mean (standard deviation) of proportions, referenced to PSG, for each sleep stage classification. Classification accuracies for each sleep stage are highlighted in bold.

Abbreviations: N1, Night1; N2, Night2; N3, Night3; REM, rapid eye movement

| Table S2. Gen3 Confusion (Degree of Agreement) Matrices | | | | |
| --- | --- | --- | --- | --- |
|  | **Gen3 wake** | **Gen3 Light** | **Gen3 Deep** | **Gen3 REM** |
| wake-N1 | **0.77(0.18)** | 0.17(0.14) | 0(0) | 0.07(0.09) |
| wake-N2 | **0.78(0.15)** | 0.15(0.12) | 0(0.01) | 0.07(0.09) |
| wake-N3 | **0.80(0.14)** | 0.15(0.12) | 0(0) | 0.05(0.07) |
| Light-N1 | 0.05(0.04) | **0.79(0.08)** | 0.05(0.04) | 0.10(0.07) |
| Light-N2 | 0.06(0.05) | **0.81(0.08)** | 0.05(0.04) | 0.09(0.06) |
| Light-N3 | 0.05(0.03) | **0.81(0.06)** | 0.06(0.05) | 0.08(0.05) |
| Deep-N1 | 0.01(0.01) | 0.38(0.22) | **0.61(0.23)** | 0(0.02) |
| Deep-N2 | 0.01(0.02) | 0.33(0.26) | **0.65(0.26)** | 0.01(0.05) |
| Deep-N3 | 0.01(0.02) | 0.34(0.24) | **0.64(0.25)** | 0(0.01) |
| REM-N1 | 0.04(0.05) | 0.13(0.11) | 0(0) | **0.83(0.14)** |
| REM-N2 | 0.07(0.08) | 0.18(0.13) | 0(0.01) | **0.75(0.15)** |
| REM-N3 | 0.05(0.07) | 0.16(0.13) | 0(0.01) | **0.79(0.16)** |

Mean (standard deviation) of proportions, referenced to PSG, for each sleep stage classification. Classification accuracies for each sleep stage are highlighted in bold.

Abbreviations: N1, Night1; N2, Night2; N3, Night3; REM, rapid eye movement.

**Supplementary Figures:**

In Supplementary Figure S1, epoch by epoch sensitivity of sleep stages is illustrated. Epoch by epoch specificity for 4-stage classification is shown in Supplementary Figure S2 across the 3 nights.


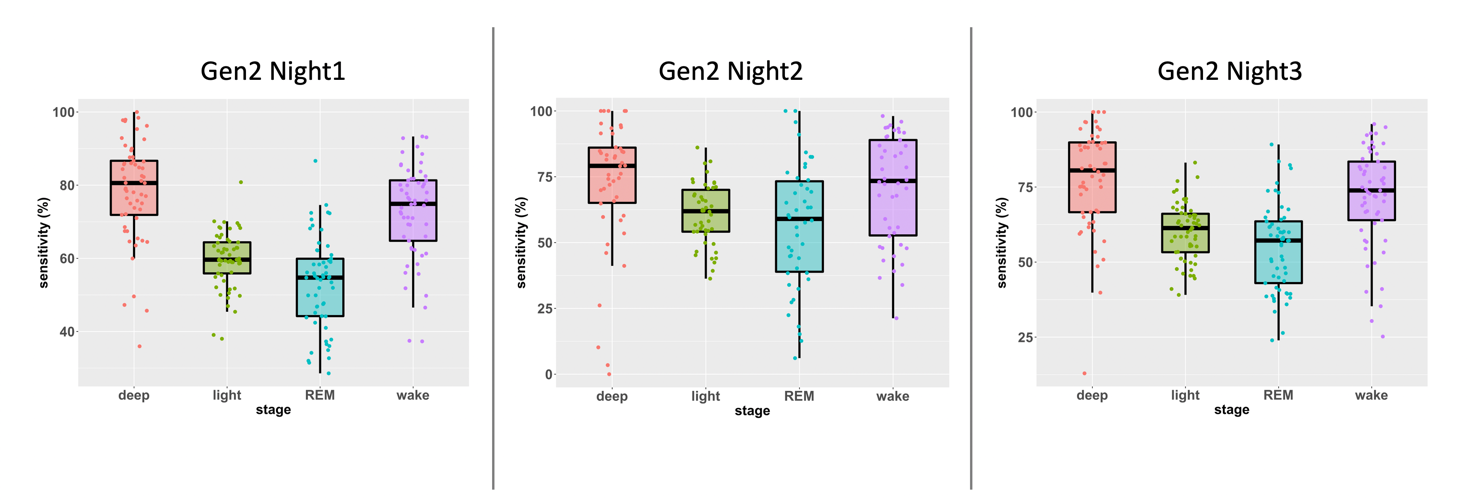


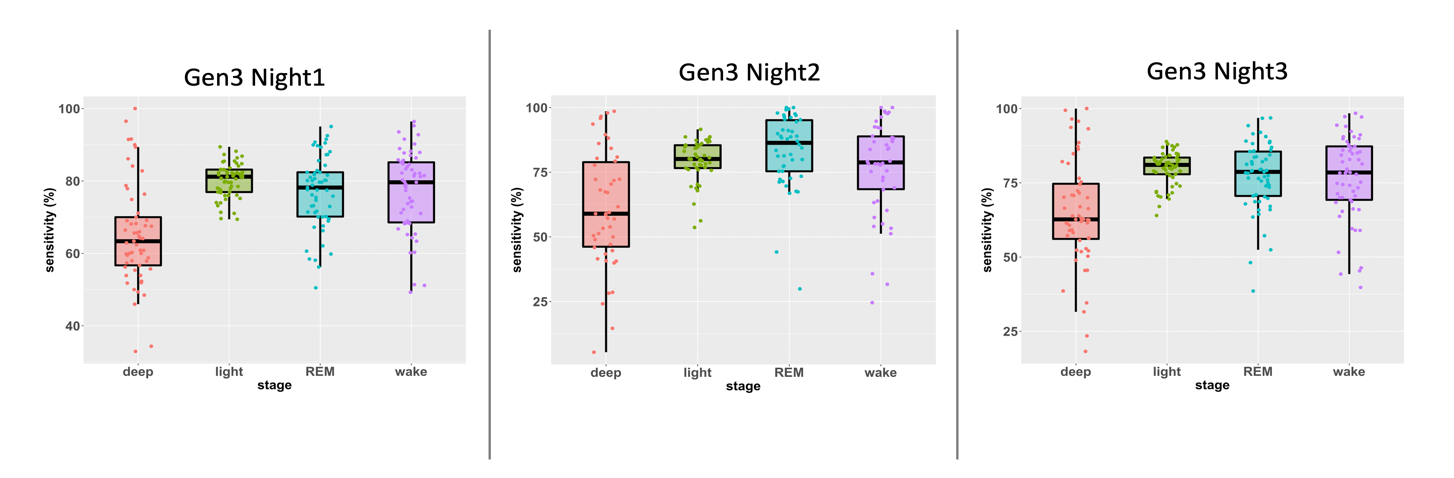
 **Supplementary Figure S1.** Epoch by epoch sensitivity for 4-stage classification. Whiskers are computed as 1.5 times the interquartile range.


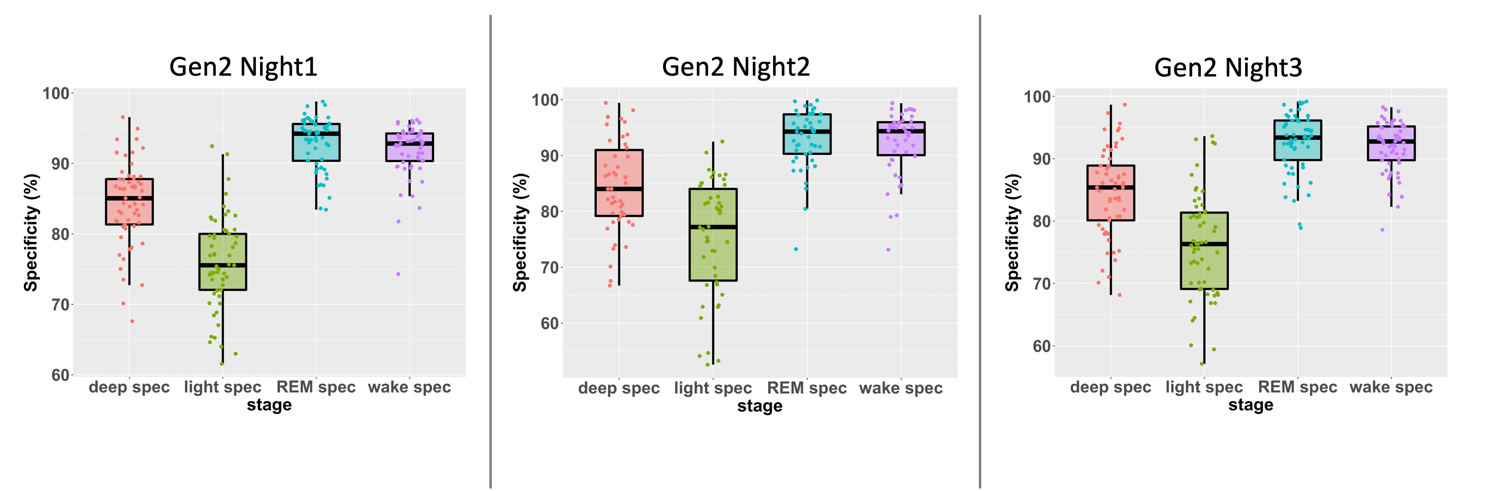


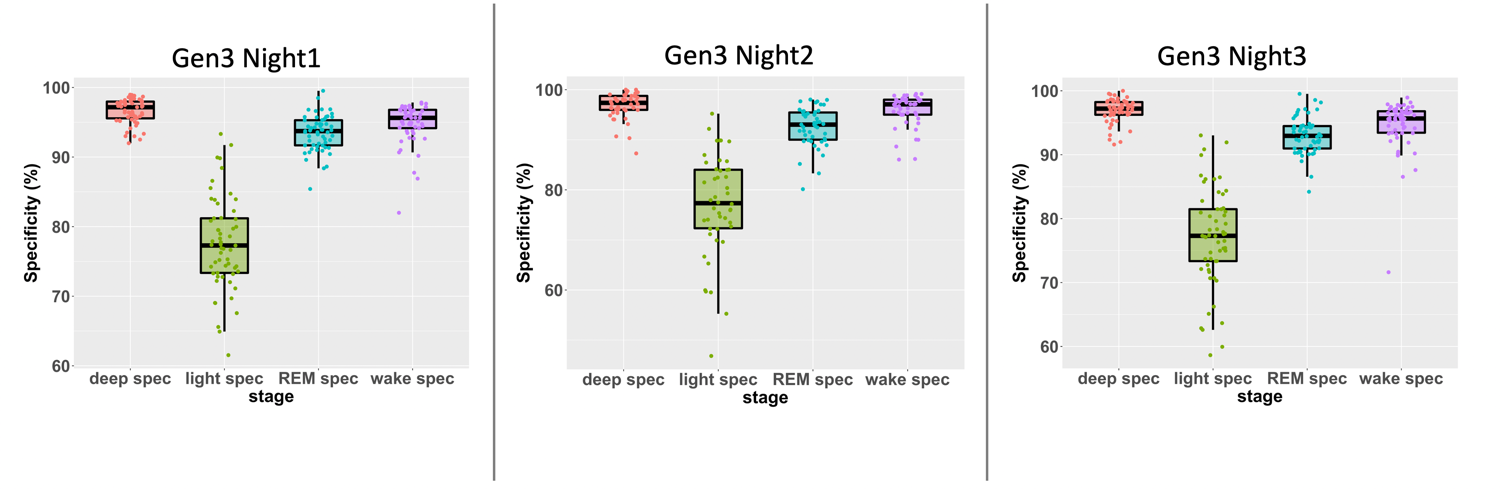


**Supplementary Figure S2.** Epoch by Epoch specificity for 4-stage classification. Whiskers are computed as 1.5 times the interquartile range.
